# Supplementary material for: Efficacy and Safety of Upadacitinib vs Dupilumab in Adults With Moderate-to-Severe Atopic Dermatitis: A Randomized Clinical Trial
Source: PubMed Central journal article supplement — JAMA Dermatol. 2021 Aug 4;157(9):1047–55. doi: 10.1001/jamadermatol.2021.3023 (PMC8340015; doi:10.1001/jamadermatol.2021.3023), 2021-08-04
Supplement: jamadermatol-e213023-s003.pdf [file jamadermatol-e213023-s003.pdf]

# Data Sharing Statement

Blauvelt. Efficacy and Safety of Upadacitinib vs Dupilumab in Adults With Moderate-to-Severe Atopic Dermatitis. *JAMA Dermatol*. Published August 04, 2021. doi:10.1001/jamadermatol.2021.3023

## Data

**Data available:** Yes

**Data types:** Deidentified participant data

**How to access data:** AbbVie is committed to responsible data sharing regarding the clinical trials we sponsor. This includes access to anonymized, individual, and trial-level data (analysis data sets), as well as other information (eg, protocols and clinical study reports), as long as the trials are not part of an ongoing or planned regulatory submission. This includes requests for clinical trial data for unlicensed products and indications. This clinical trial data can be requested by any qualified researchers who engage in rigorous, independent scientific research, and will be provided following review and approval of a research proposal and statistical analysis plan and execution of a data sharing agreement. Data requests can be submitted at any time and the data will be accessible for 12 months, with possible extensions considered. For more information on the process, or to submit a request, visit the following link: <https://www.abbvie.com/our-science/clinical-trials/clinical-trials-data-and-information-sharing/data-and-information-sharing-with-qualified-researchers.html>.

**When available:** With publication

## Supporting Documents

**Document types:** None

## Additional Information

**Who can access the data:** This clinical trial data can be requested by any qualified researchers who engage in rigorous, independent scientific research, and will be provided following review and approval of a research proposal and statistical analysis plan and execution of a data sharing agreement.

**Types of analyses:** For any purpose

**Mechanisms of data availability:** Data will be provided following review and approval of a research proposal and statistical analysis plan and execution of a data sharing agreement.
